# Supplementary material for: A Rationally Engineered Capsid Variant of AAV9 for Systemic CNS-Directed and Peripheral Tissue-Detargeted Gene Delivery in Neonates
Source: PubMed Central journal article supplement — Mol Ther Methods Clin Dev. 2018 Mar 16;9:234–46. doi: 10.1016/j.omtm.2018.03.004 (PMC5948233; doi:10.1016/j.omtm.2018.03.004), 2018-03-16
Supplement: mmc1.pdf [file mmc1.pdf]

**OMTM, Volume 9**

**Supplemental Information**

**A Rationally Engineered Capsid Variant of AAV9  
for Systemic CNS-Directed and Peripheral  
Tissue-Detargeted Gene Delivery in Neonates**

**Dan Wang, Shaoyong Li, Dominic J. Gessler, Jun Xie, Li Zhong, Jia Li, Karen Tran, Kim Van Vliet, Lingzhi Ren, Qin Su, Ran He, Jason E. Goetzmann, Terence R. Flotte, Mavis Agbandje-McKenna, and Guangping Gao**

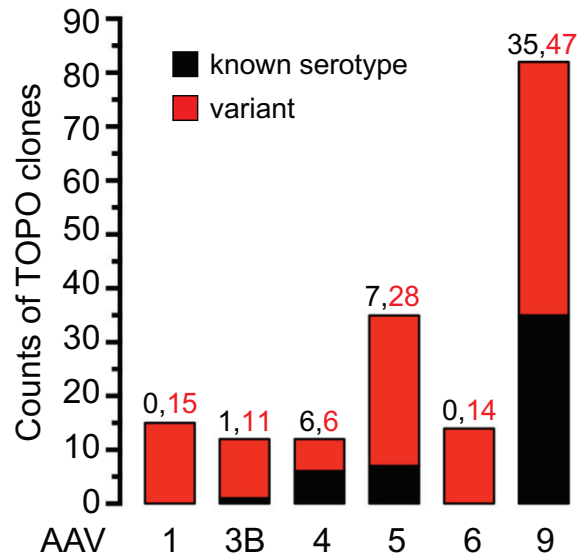

**Figure S1.** Stacked histogram showing the number of AAV capsid sequences isolated from a chimpanzee. The counts of TOPO clones representing known AAV serotypes 1, 3B, 4, 5, 6, and 9 are shown in black, and the counts of variants are shown in red. The exact counts of known serotypes and variants are labeled above each bar.

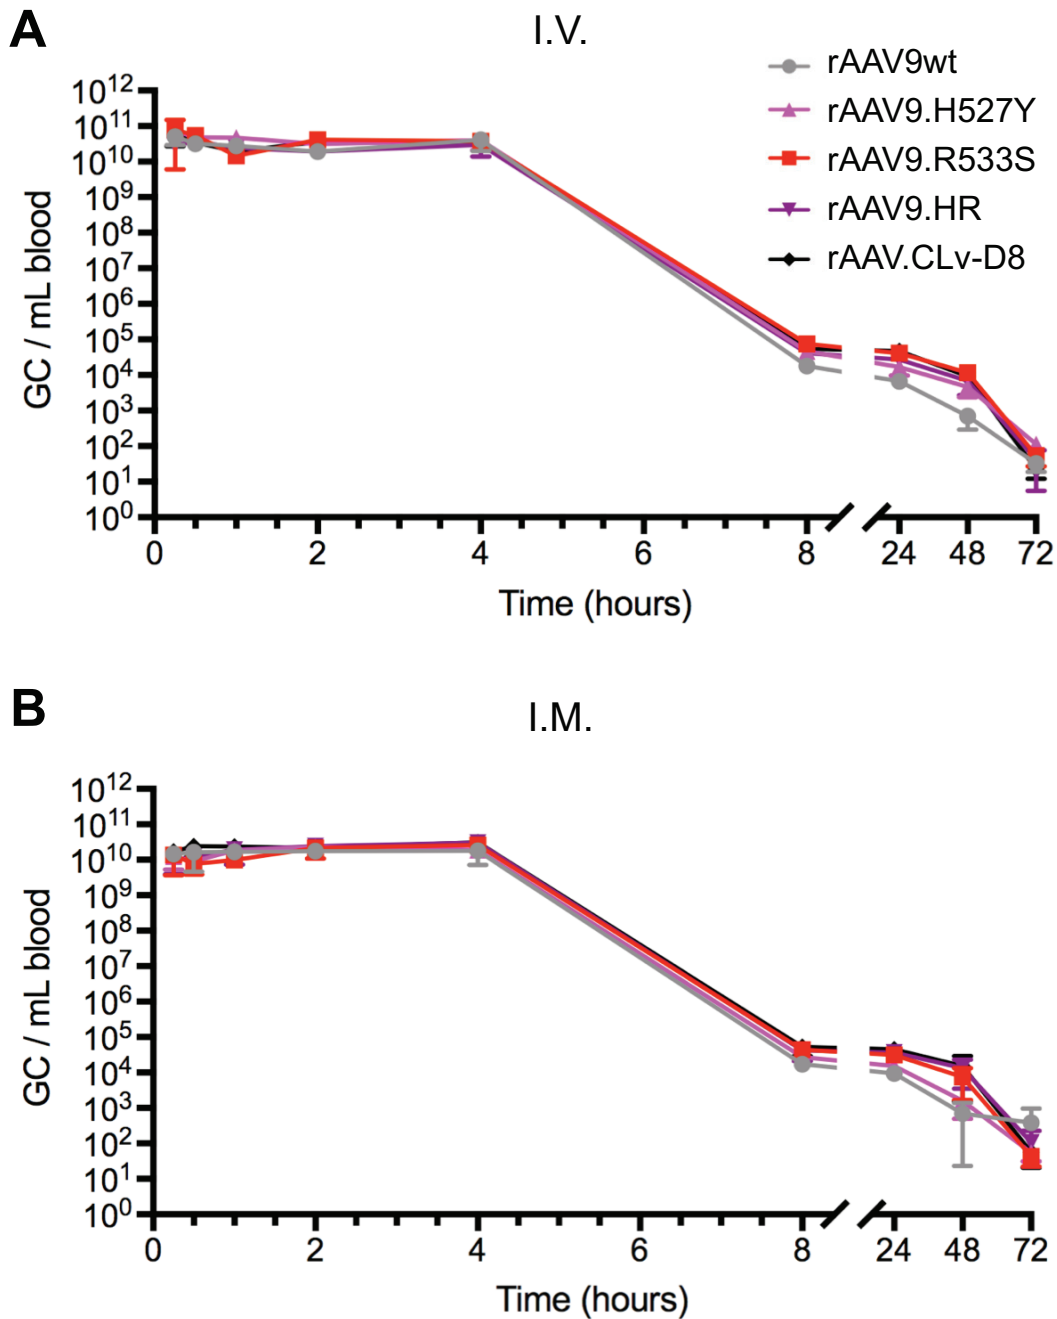

**Figure S2.** Blood clearance of vectors following delivery into mice. The same single-stranded recombinant AAV genome expressing luciferase was packaged into each of 5 capsids as indicated. Following I.V. (**A**) or I.M. (**B**) injection of  $1.0E+11$  GC rAAV into 6-week old male mice, the rAAV genome copies per milliliter of blood (GC/mL blood) were plotted over time after vector delivery.

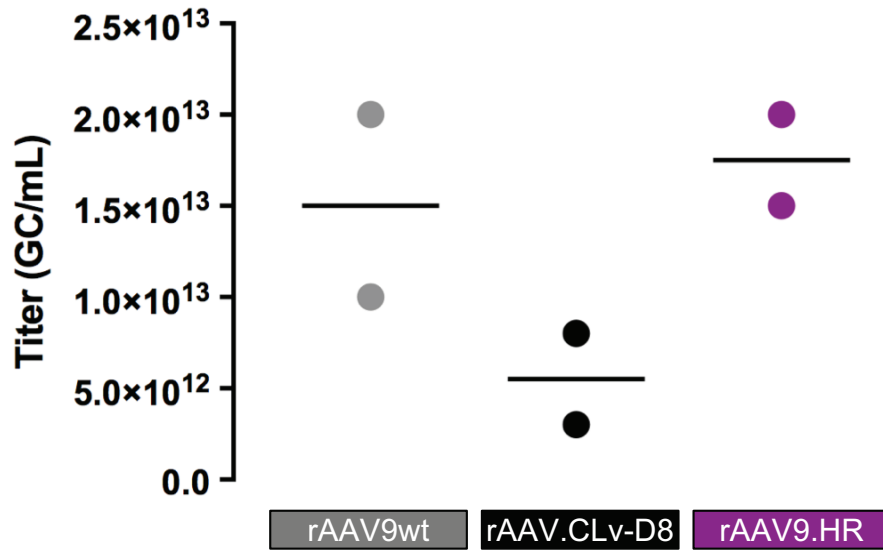

**Figure S3.** Packaging efficiency of the rAAV9wt, rAAV.CLv-D8, and rAAV9.HR vectors harboring the same single-stranded luciferase-expressing genome. Two preparations with each capsid were included in the comparison.

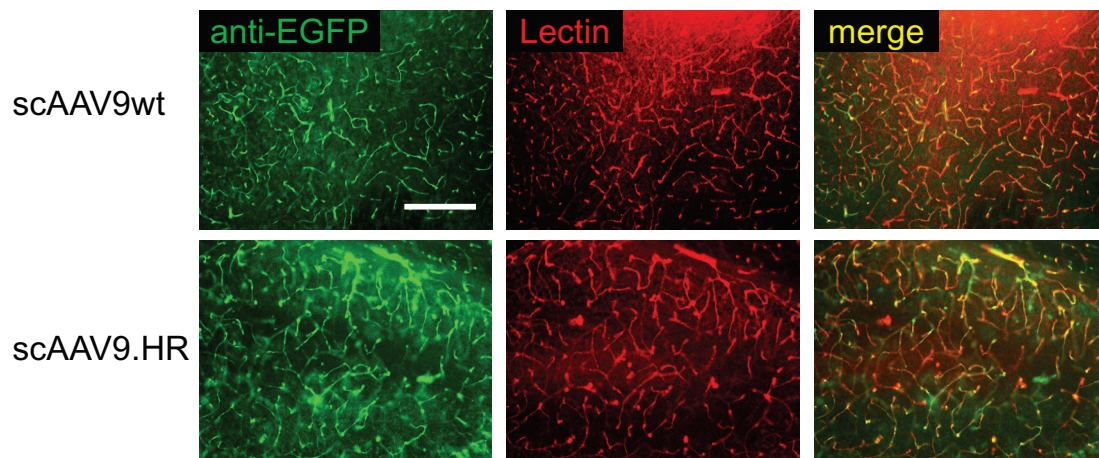

**Figure S4.** Blood vessel transduction in adult mice following I.V. delivery of  $4E+12$  GC of scAAV9wt-EGFP or scAAV9.HR-EGFP. Immunofluorescence staining images of brain sections showing the co-localization of transduction signal (anti-EGFP) and vasculature (Lectin staining). 6-week-old mice were treated with EGFP-expressing vectors as described in Figure 3. Scale bar: 200 microns.

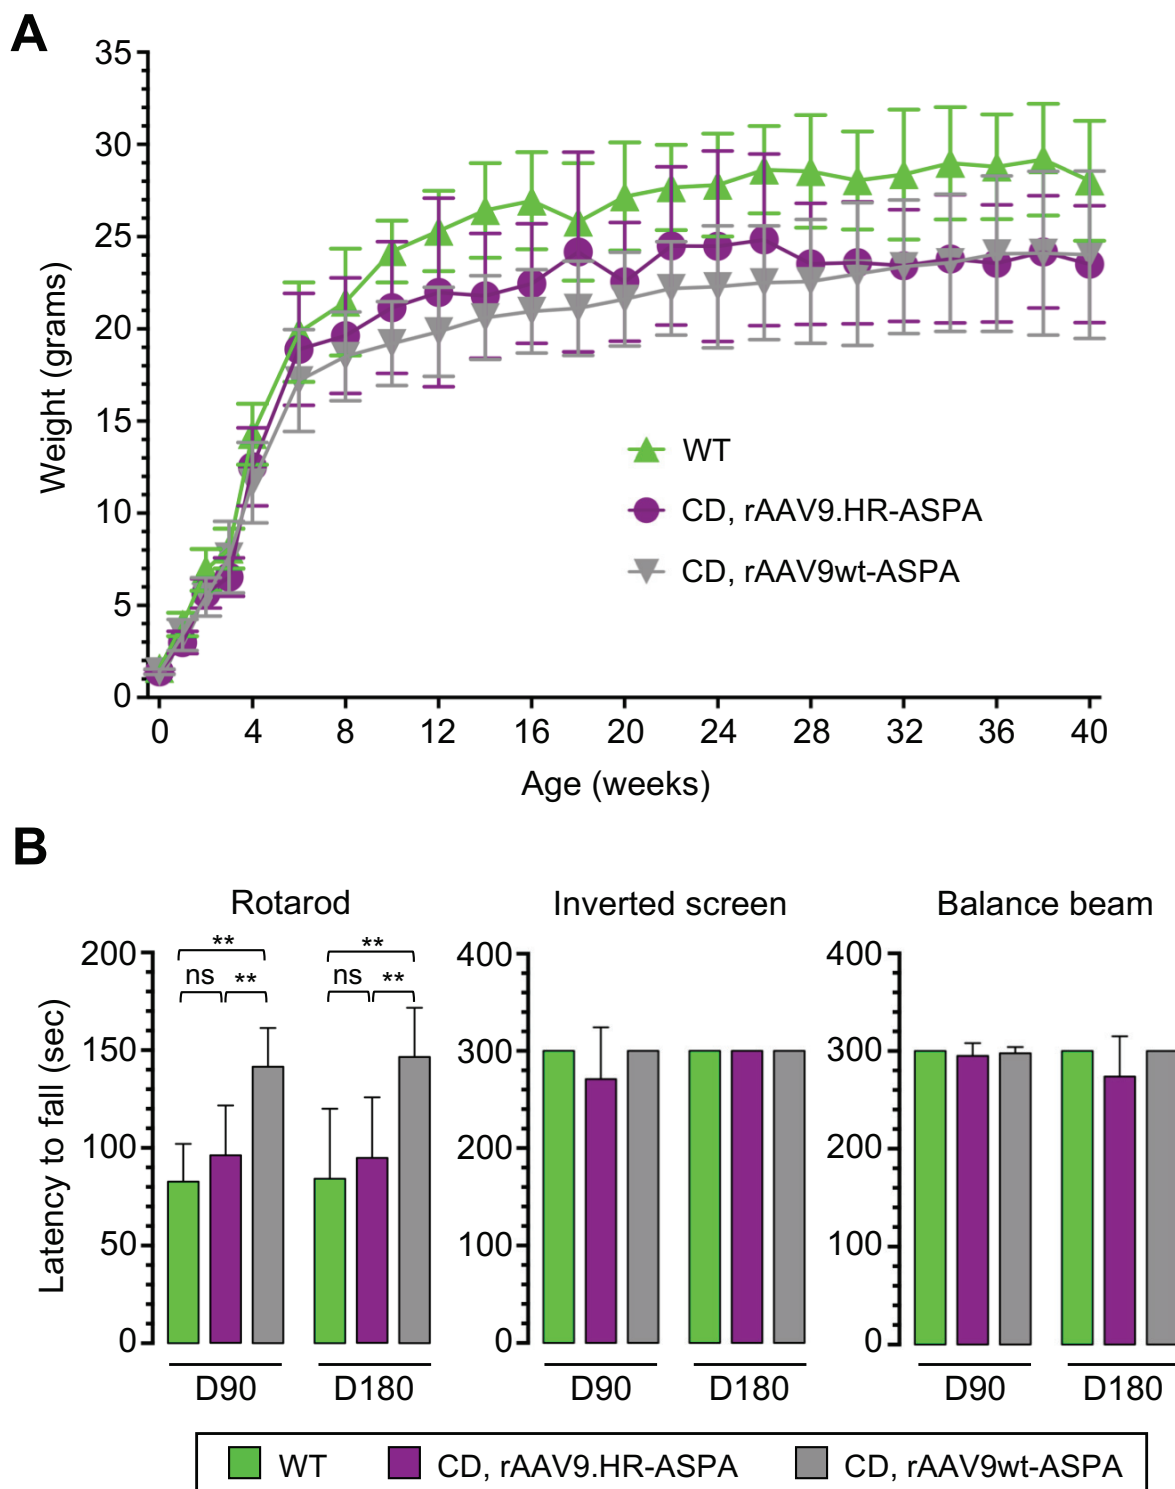

**Figure S5.** I.V. delivery of rAAV9.HR-ASPA and rAAV9wt-ASPA at P1 to CD mice rescued body weight loss and behavioral deficits over an extended period of time. **A.** Body weight curves plotted against age of untreated WT mice (green), untreated CD mice (red) and CD mice treated with rAAV9.HR-ASPA (purple) or rAAV9wt-ASPA (gray). N=10 mice per group. **B.** Motor function performance of untreated WT mice (green), untreated CD mice (red) and CD mice treated with rAAV9.HR-ASPA (purple) or rAAV9wt-ASPA (gray) in three behavioral tests including rotarod test, inverted screen test and balance beam test. Tests were performed when mice reached 90 days old (D90) or 180 days old (D180). N=6 mice per group per test. One-way ANOVA was performed ( $p < 0.01$  for rotarod test; not significant for the other tests). \*\* $p < 0.01$  and ns: not significant by Tukey's multiple comparisons test. All data are presented as mean and standard deviation.

**Table S1.** Amino acid residue changes of the AAV9 variants isolated from chimpanzee tissues.

| Tissue | Template Source | ID     | # of residue changes | VP1u* (aa 1-137) | VP1/2* (aa 138-202) | VP3* (aa 203-736)                                      |       |
|--------|-----------------|--------|----------------------|------------------|---------------------|--------------------------------------------------------|-------|
| Brain  | RNA             | CBr-E3 | 1                    | N66S             |                     |                                                        |       |
|        |                 | CBr-E4 | 1                    |                  |                     | M471T                                                  |       |
|        |                 | CBr-E1 | 2                    |                  |                     | S414G, N696D                                           |       |
|        |                 | CBr-E2 | 2                    |                  |                     | H292R, T652A                                           |       |
|        |                 | CBr-e5 | 2                    |                  |                     | K316R, N598S                                           |       |
|        |                 | CBr-E7 | 2                    | A121D            |                     | N305del                                                |       |
|        |                 | CBr-E8 | 2                    |                  |                     | V239A, I560T                                           |       |
|        |                 | CBr-E5 | 3                    |                  |                     | N409S, V572A, Y701H                                    |       |
|        |                 | CBr-E6 | 4                    |                  |                     | G282R, N305del, V344A, K666E                           |       |
|        |                 | Liver  | DNA                  | CLv1-8           | 6                   |                                                        |       |
| CLv1-2 | 7               |        |                      | K123R            |                     | V322I, S348L, Y445H, H527Y, R533S, I647T               |       |
| CLv1-1 | 8               |        |                      | G49D, A70V       |                     | R238G, Y445H, S458P, H527Y, R533S, I647T               |       |
| CLv1-7 | 8               |        |                      |                  |                     | I240V, Y426H, Y445H, P468H, H527Y, R533S, I647T, E684G |       |
| CLv1-3 | 9               |        |                      | N66S             | P183S               | P367S, Y445H, H527Y, R533S, N552D, M559I, I647T        |       |
| CLv1-4 | 9               |        |                      | D97G             |                     | D219G, I240V, E361G, Y445H, N477S, H527Y, R533S, I647T |       |
| RNA    | CLv-D6          |        |                      | 1                |                     |                                                        | Y445H |
| CLv-R3 | 1               |        |                      |                  |                     | W298R                                                  |       |
| CLv-R8 | 1               |        |                      |                  |                     | S708P                                                  |       |
| CLv-D3 | 2               |        |                      | L131P            |                     | V580A                                                  |       |
| CLv-D4 | 2               |        | L131P                |                  | Q299R               |                                                        |       |
| CLv-D5 | 2               |        | P89L                 |                  | Y445H               |                                                        |       |
| CLv-R2 | 2               |        |                      |                  | L439P, S722G        |                                                        |       |
| CLv-R4 | 2               |        |                      |                  | D231N, S469G        |                                                        |       |
| CLv-D1 | 3               |        | A121D                | D154G            | Y445H               |                                                        |       |
| CLv-R5 | 3               |        | K51R                 |                  | I334V, E723G        |                                                        |       |

|        |     |               |          |                  |              |                                          |
|--------|-----|---------------|----------|------------------|--------------|------------------------------------------|
|        |     | CLv-D7        | 4        |                  |              | N263T, Q442X, Y445H, G604D               |
|        |     | <b>CLv-D8</b> | <b>4</b> |                  |              | <b>Y445H, H527Y, R533S, I647T</b>        |
|        |     | CLv-R1        | 4        | K33R             |              | Y350C, M436T, Y577H                      |
|        |     | <b>CLv-D2</b> | 5        | L7F              | P191S        | F400L, Y445H, M524V                      |
|        |     | CLv-R9        | 6        | D76N, Y93C       | L125P, G199R | F275L, A523T                             |
|        |     | CLv-R7        | 8        | H38R, D87G, Y90C | K161R        | T333A, N452D, N519D, D626G               |
| Lung   | RNA | CLg-F5        | 2        | Y93C             |              | F275L                                    |
|        |     | CLg-F2        | 4        | D76N, Y93C       | G199R        | F275L                                    |
|        |     | CLg-F7        | 4        | Y93C             |              | F275L, G276D, D609G                      |
|        |     | CLg-F3        | 5        | Y93C             |              | F275L, K316E, F413S, V489A               |
|        |     | CLg-F1        | 6        | E74V, Y93C       |              | F275L, M373T, T729P, L736F               |
|        |     | CLg-F4        | 6        | Y93C             | S195P        | F275L, N452S, N498S, P603S               |
| Spleen | DNA | CSp-10        | 1        |                  |              | M640V                                    |
|        |     | CSp-3         | 1        |                  |              | F275L                                    |
|        |     | CSp-9         | 2        |                  |              | N668D, E698V                             |
|        |     | CSp-11        | 3        |                  |              | I302T, F400I, M640V                      |
|        |     | CSp-2         | 3        |                  |              | F543S, D556N, G639E                      |
|        |     | CSp-4         | 3        |                  | S181P        | D370G, V493A                             |
|        |     | CSp-6         | 3        | E99G             | D184V        | T548A                                    |
|        |     | CSp-1         | 4        | L7P, Y90H        |              | M640V, K666R                             |
|        |     | CSp-7         | 4        | W22R, L126X      |              | L432P, M640V                             |
|        |     | CSp-8         | 6        |                  |              | M203I, Q259R, Q321R, A335T, Q495R, M640V |

\*VP1u: VP1 unique region; VP1/2: Shared region between VP1 and VP2; VP3: VP3 region.
